# Supplementary material for: L-Selectin/CD62L Is a Key Driver of Non-Alcoholic Steatohepatitis in Mice and Men
Source: MDPI journal article supplement (doi:10.3390/cells9051106), 2020-04-29
Supplement: s1 [file s1]

# Appendix A: Representative health reports of animals used in this study

Institute for Laboratory Animal Science  
University Hospital RWTH Aachen  
Pauwelsstr. 30, 52074 Aachen  
Germany

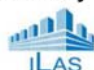

PD Dr. phil. nat. Julia Steitz  
Fr. Katharina Pietsch  
Tel.: +49 241 80 - 88603  
Fax: +49 241 80 - 82462  
Email:  
jsteitz@ukaachen.de  
kpietsch@ukaachen.de

| Health Report | FB-L-MIBI-013-04 | Date of issue: 29-Sep-16 |
|---------------|------------------|--------------------------|
|---------------|------------------|--------------------------|

Hygienic unit: Barrier yellow, Floor 55, Room 4  
Opening: August 2014  
Species within the unit: Mice  
Owner: Dr. rer nat. Angela Schippers  
Klinik für Kinder- und Jugendmedizin

U-Nr.: 259,260/2016  
Animals tested: Sentinels - CD-1  
Age at time of control 4 month  
Control: 3/4 in 2016

| VIRUSES                                         | Test frequency | Latest test date | Latest results | Historical results ≤ 18 months | Test method | Test laboratory |
|-------------------------------------------------|----------------|------------------|----------------|--------------------------------|-------------|-----------------|
| Lymphocytic choriomeningitis virus (LCM)        | annually       | 10-Nov-15        | 0/2            | 0/2                            | IFA         | BioDoc          |
| Minute virus of mice (MVM)                      | quarterly      | 03-Aug-16        | 0/2            | 0/12                           | IFA         | BioDoc          |
| Mouse adenovirus type 1 (FL)                    | annually       | 10-Nov-15        | 0/2            | 0/2                            | IFA         | BioDoc          |
| Mouse adenovirus type 2 (K87)                   | annually       | 10-Nov-15        | 0/2            | 0/2                            | IFA         | BioDoc          |
| Mouse hepatitis virus (MHV)                     | quarterly      | 03-Aug-16        | 0/2            | 0/12                           | IFA         | BioDoc          |
| Mouse parvovirus (MPV)                          | quarterly      | 03-Aug-16        | 0/2            | 0/12                           | IFA         | BioDoc          |
| Mouse rotavirus (EDIM)                          | quarterly      | 03-Aug-16        | 0/2            | 0/12                           | IFA         | BioDoc          |
| Mousepox (ectromelia) virus                     | annually       | 10-Nov-15        | 0/2            | 0/2                            | IFA         | BioDoc          |
| Murine norovirus                                | quarterly      | 03-Aug-16        | 0/2            | 0/12                           | IFA         | BioDoc          |
| Pneumonia virus of mice (PVM)                   | annually       | 10-Nov-15        | 0/2            | 0/2                            | IFA         | BioDoc          |
| Reovirus type 3                                 | annually       | 10-Nov-15        | 0/2            | 0/2                            | IFA         | BioDoc          |
| Sendai virus                                    | annually       | 10-Nov-15        | 0/2            | 0/2                            | IFA         | BioDoc          |
| Theiler's murine encephalomyelitis virus (TMEV) | quarterly      | 03-Aug-16        | 0/2            | 0/12                           | IFA         | BioDoc          |

| BACTERIA / MYCOPLASMA / FUNGI             | Test frequency | Latest test date | Latest results | Historical results ≤ 18 months | Test method | Test laboratory |
|-------------------------------------------|----------------|------------------|----------------|--------------------------------|-------------|-----------------|
| Citrobacter rodentium                     | quarterly      | 03-Aug-16        | 0/2            | 0/12                           | CULT        | ILAS            |
| Clostridium piliformis (Tyzzer's disease) | annually       | 10-Nov-15        | 0/2            | 0/2                            | IFA         | BioDoc          |
| Corynebacterium kutscheri                 | quarterly      | 03-Aug-16        | 0/2            | 0/12                           | CULT        | ILAS            |
| Helicobacter spp.                         | quarterly      | 03-Aug-16        | 0/2            | 0/12                           | PCR         | BioDoc          |
| Mycoplasma pulmonis                       | annually       | 10-Nov-15        | 0/2            | 0/2                            | IFA         | BioDoc          |
| Pasteurella pneumotropica                 | quarterly      | 03-Aug-16        | 0/2            | 0/12                           | IFA         | BioDoc          |
| Pasteurella pneumotropica                 | quarterly      | 03-Aug-16        | 0/2            | 0/12                           | CULT        | ILAS            |
| Salmonella spp.                           | quarterly      | 03-Aug-16        | 0/2            | 0/12                           | CULT        | ILAS            |
| β-hemolytic Streptococci (not group D)    | quarterly      | 03-Aug-16        | 0/2            | 0/12                           | CULT        | ILAS            |
| Streptobacillus moniliformis              | quarterly      | 03-Aug-16        | 0/2            | 0/12                           | CULT        | ILAS            |
| Streptococcus pneumoniae                  | quarterly      | 03-Aug-16        | 0/2            | 0/12                           | CULT        | ILAS            |

| PARASITES     | Test frequency | Latest test date | Latest results | Historical results ≤ 18 months | Test method         | Test laboratory |
|---------------|----------------|------------------|----------------|--------------------------------|---------------------|-----------------|
| Ectoparasites | quarterly      | 03-Aug-16        | 0/2            | 0/12                           | MICR                | ILAS            |
| Endoparasites | quarterly      | 03-Aug-16        | 0/2            | 0/12                           | Flotation/Tape Test | ILAS            |

| Pathological lesions observed | Test frequency | Latest test date | Latest results | Historical results ≤ 18 months | Test method | Test laboratory |
|-------------------------------|----------------|------------------|----------------|--------------------------------|-------------|-----------------|
|                               | quarterly      | 03-Aug-16        | 0/2            | 0/12                           | PATH        | ILAS            |

BioDoc: Prof. Dr. M. Mähler, Hannover, Germany  
ILAS: Inst. f. Laboratory Animal Science, University Hospital RWTH Aachen  
\*Trichomonas spp.

Data are expressed as number positive animals/number examined.

Screening samples: animals are tested at least quarterly. Necropsy, pathology, number of samples and methods comply with the "FELASA recommendations for the health monitoring of mouse, rat, hamster, guinea pig and rabbit colonies in breeding and experimental units." (Lab Anim. 2014 Mar 4.)

Abbreviations used in this report:

ELISA = enzyme-linked immunosorbent assay, MICR = microscopy, IFA = Immunfluorescence assay, CULT = culture, PATH = gross pathology, PCR = polymerase chain reaction, HIST = histopathology, NT = not tested

# Appendix A: Representative health reports of animals used in this study

Institute for Laboratory Animal Science  
University Hospital RWTH Aachen  
Pauwelsstr. 30, 52074 Aachen  
Germany

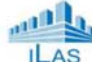

PD Dr. phil. nat. Julia Steitz  
Fr. K. Pietsch  
Tel.: +49 241 80 - 88603  
Fax: +49 241 80 - 82462  
Email:  
[jsteitz@ukaachen.de](mailto:jsteitz@ukaachen.de)  
[kpietsch@ukaachen.de](mailto:kpietsch@ukaachen.de)

| Health Report | FB-L-MIBI-013-04 | Date of issue: 29-Sep-16 |
|---------------|------------------|--------------------------|
|---------------|------------------|--------------------------|

Hygienic unit: **Barrier Red, Floor 53**  
Opening: December 2009  
Species within the unit: Mice, genetically modified, breeding  
Owner: **Dr. rer nat Angela Schippers**  
**Klinik für Kinder- und Jugendmedizin**

U-Nr.: **246-256/16**  
Animals tested: Sentinels CD-1  
Age at time of control: 7 months  
Control: **3/4 in 2016**

| VIRUSES                                         | Test frequency | Latest test date | Latest results | Historical results ≤ 18 months | Test method | Test laboratory |
|-------------------------------------------------|----------------|------------------|----------------|--------------------------------|-------------|-----------------|
| Lymphocytic choriomeningitis virus (LCM)        | annually       | 03-Nov-15        | 0/13           | 0/13                           | IFA         | BioDoc          |
| Minute virus of mice (MVM)                      | quarterly      | 05-Jul-16        | 0/14           | 0/80                           | IFA         | BioDoc          |
| Mouse adenovirus type 1 (FL)                    | annually       | 03-Nov-15        | 0/13           | 0/13                           | IFA         | BioDoc          |
| Mouse adenovirus type 2 (K87)                   | annually       | 03-Nov-15        | 0/13           | 0/13                           | IFA         | BioDoc          |
| Mouse hepatitis virus (MHV)                     | quarterly      | 05-Jul-16        | 0/14           | 0/80                           | IFA         | BioDoc          |
| Mouse parvovirus (MPV)                          | quarterly      | 05-Jul-16        | 0/14           | 0/80                           | IFA         | BioDoc          |
| Mouse rotavirus (EDIM)                          | quarterly      | 05-Jul-16        | 0/14           | 0/80                           | IFA         | BioDoc          |
| Mousepox (ectromelia) virus                     | annually       | 03-Nov-15        | 0/13           | 0/13                           | IFA         | BioDoc          |
| Murine norovirus                                | quarterly      | 05-Jul-16        | 0/14           | 0/80                           | IFA         | BioDoc          |
| Pneumonia virus of mice (PVM)                   | annually       | 03-Nov-15        | 0/13           | 0/13                           | IFA         | BioDoc          |
| Reovirus type 3                                 | annually       | 03-Nov-15        | 0/13           | 0/13                           | IFA         | BioDoc          |
| Sendai virus                                    | annually       | 03-Nov-15        | 0/13           | 0/13                           | IFA         | BioDoc          |
| Theiler's murine encephalomyelitis virus (TMEV) | quarterly      | 05-Jul-16        | 0/14           | 0/80                           | IFA         | BioDoc          |

| BACTERIA / MYCOPLASMA / FUNGI             | Test frequency | Latest test date | Latest results | Historical results ≤ 18 months | Test method | Test laboratory |
|-------------------------------------------|----------------|------------------|----------------|--------------------------------|-------------|-----------------|
| Citrobacter rodentium                     | quarterly      | 05-Jul-16        | 0/14           | 0/80                           | CULT        | ILAS            |
| Clostridium piliformis (Tyzzer's disease) | annually       | 03-Nov-15        | 0/13           | 0/13                           | IFA         | BioDoc          |
| Corynebacterium kutscheri                 | quarterly      | 05-Jul-16        | 0/14           | 0/80                           | CULT        | ILAS            |
| Helicobacter spp.                         | quarterly      | 05-Jul-16        | 0/14           | 0/80                           | PCR         | BioDoc          |
| Mycoplasma pulmonis                       | annually       | 03-Nov-15        | 0/13           | 0/13                           | IFA         | BioDoc          |
| Pasteurella pneumotropica                 | quarterly      | 05-Jul-16        | 0/14           | 0/80                           | IFA         | BioDoc          |
| Pasteurella pneumotropica                 | quarterly      | 05-Jul-16        | 0/14           | 0/80                           | CULT        | ILAS            |
| Salmonella spp.                           | quarterly      | 05-Jul-16        | 0/14           | 0/80                           | CULT        | ILAS            |
| β-hemolytic Streptococci (not group D)    | quarterly      | 05-Jul-16        | 0/14           | 0/80                           | CULT        | ILAS            |
| Streptobacillus moniliformis              | quarterly      | 05-Jul-16        | 0/14           | 0/80                           | CULT        | ILAS            |
| Streptococcus pneumoniae                  | quarterly      | 05-Jul-16        | 0/14           | 0/80                           | CULT        | ILAS            |

| PARASITES     | Test frequency | Latest test date | Latest results | Historical results ≤ 18 months | Test method         | Test laboratory |
|---------------|----------------|------------------|----------------|--------------------------------|---------------------|-----------------|
| Ectoparasites | quarterly      | 05-Jul-16        | 0/14           | 0/80                           | MICR                | ILAS            |
| Endoparasites | quarterly      | 05-Jul-16        | 0/14           | 0/80                           | Flotation/Tape Test | ILAS            |

| Pathological lesions observed | Test frequency | Latest test date | Latest results | Historical results ≤ 18 months | Test method | Test laboratory |
|-------------------------------|----------------|------------------|----------------|--------------------------------|-------------|-----------------|
|                               | quarterly      | 05-Jul-16        | 0/14           | 0/80                           | PATH        | ILAS            |

BioDoc: Prof. Dr. M. Mähler, Hannover, Germany  
ILAS: Inst. f. Laboratory Animal Science, University Hospital RWTH Aachen

Data are expressed as number positive animals/number examined.

Screening samples: animals are tested at least quarterly. Necropsy, pathology, number of samples and methods comply with the "FELASA recommendations for the health monitoring of mouse, rat, hamster, guinea pig and rabbit colonies in breeding and experimental units." (Lab Anim. 2014 Mar 4.)

Abbreviations used in this report:

ELISA = enzyme-linked immunosorbent assay, MICR = microscopy, IFA = Immunofluorescence assay, CULT = culture, PATH = gross pathology, PCR = polymerase chain reaction, HIST = histopathology, NT = not tested

FB-L-MIBI-013-04.xls

Stand: 01.10.2014
